# Supplementary material for: YfiBNR Mediates Cyclic di-GMP Dependent Small Colony Variant Formation and Persistence in Pseudomonas aeruginosa
Source: PubMed Central journal article supplement (PMC2837407; doi:10.1371/journal.ppat.1000804), 2010-03-12
Supplement: ppat.1000804.s004.pdf [file ppat.1000804.s004.pdf]

swarming

swimming

twitching

**A**

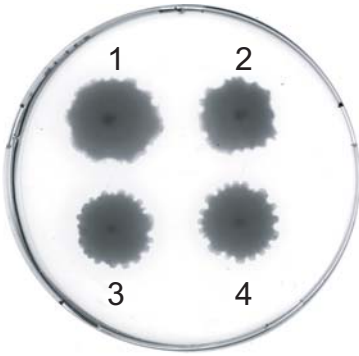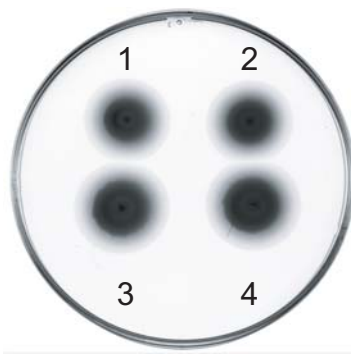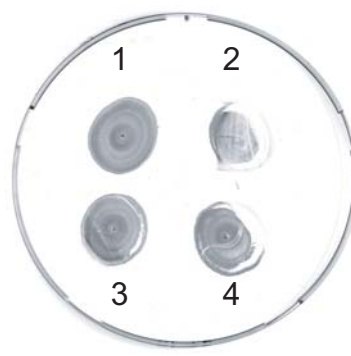

- 1- PAO1
- 2- PAO1  $\Delta pel$
- 3- PAO1  $\Delta psl$
- 4- PAO1  $\Delta pel \Delta psl$

**B**

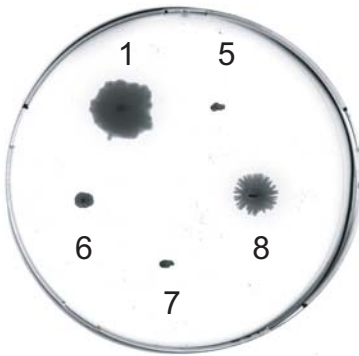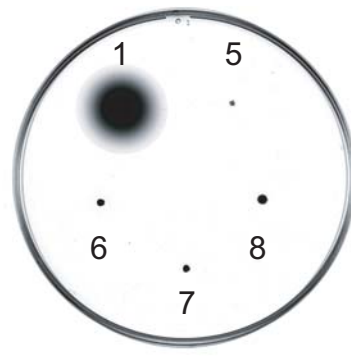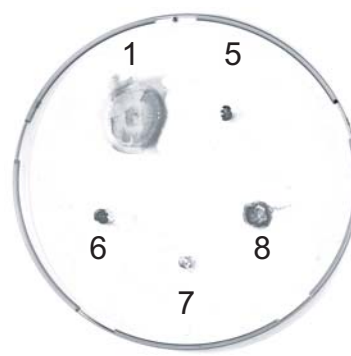

- 5-  $\Delta yfiR$
- 6-  $\Delta yfiR \Delta pel$
- 7-  $\Delta yfiR \Delta psl$
- 8-  $\Delta yfiR \Delta pel \Delta psl$

**C**

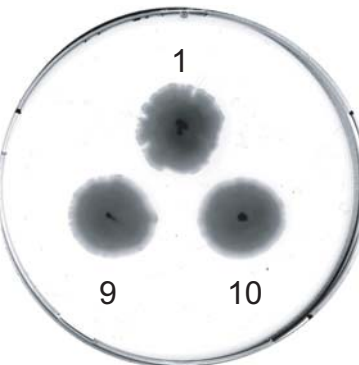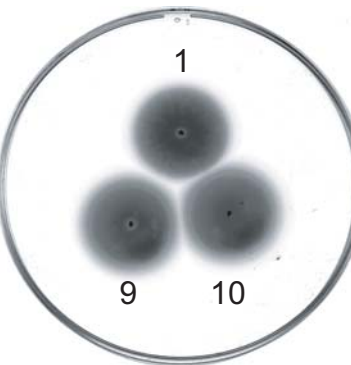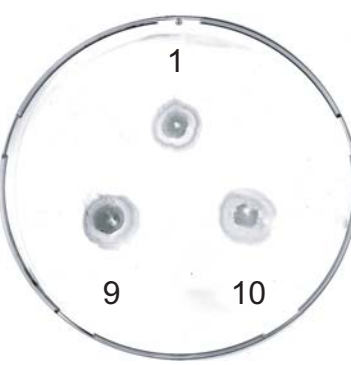

- 9- PAO1 pBBR
- 10- PAO1  $\Delta yfiR$

**D**

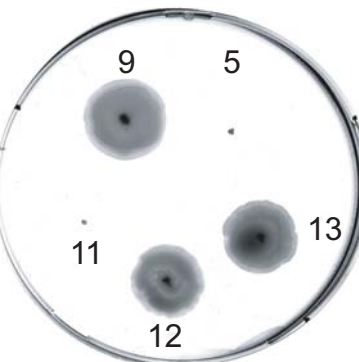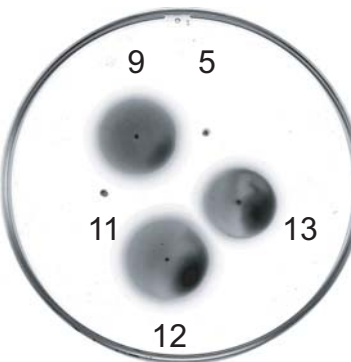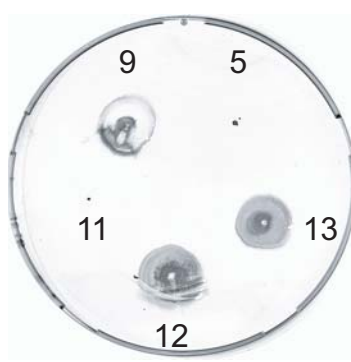

- 11-  $\Delta yfiR$  pBBR
- 12-  $\Delta yfiR$   $\Delta yfiR$  pBBR
- 13-  $\Delta yfiR$  Tn7:: $yfiR$
