# Supplementary material for: YfiBNR Mediates Cyclic di-GMP Dependent Small Colony Variant Formation and Persistence in Pseudomonas aeruginosa
Source: PubMed Central journal article supplement (PMC2837407; doi:10.1371/journal.ppat.1000804), 2010-03-12

**A**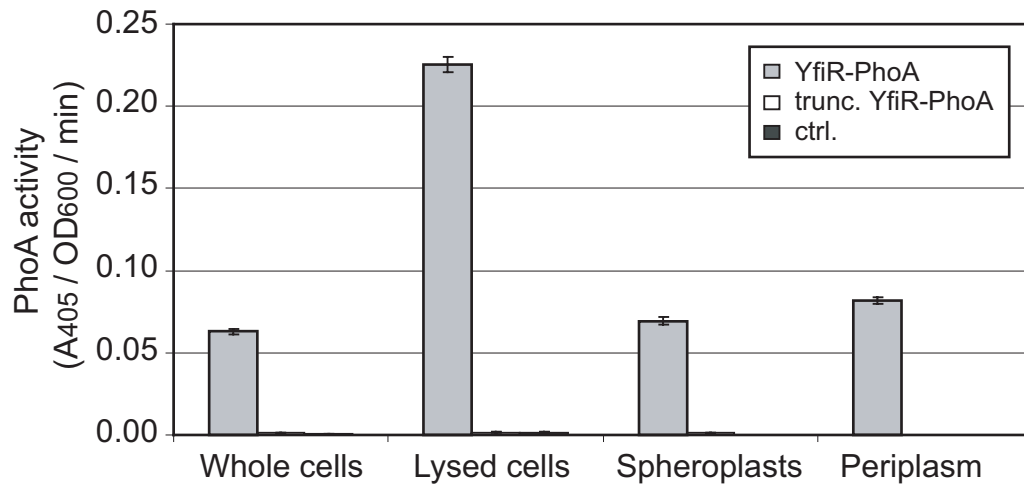**B**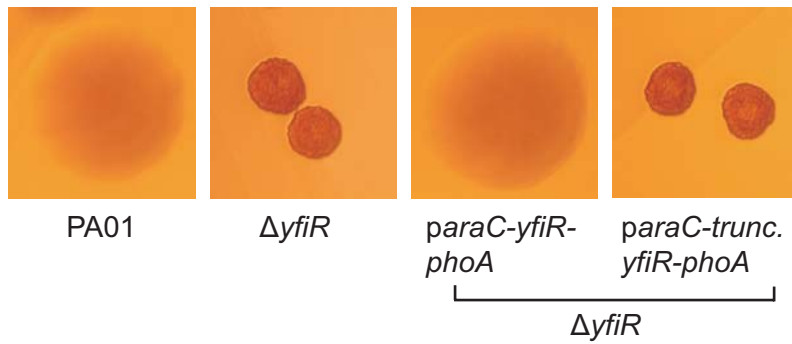**C**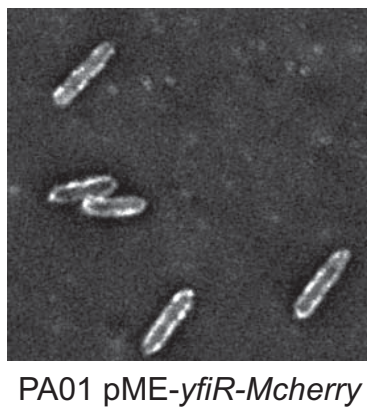

Supplement: ppat.1000804.s005.pdf [file ppat.1000804.s005.pdf]
