# Supplementary material for: YfiBNR Mediates Cyclic di-GMP Dependent Small Colony Variant Formation and Persistence in Pseudomonas aeruginosa
Source: PubMed Central journal article supplement (PMC2837407; doi:10.1371/journal.ppat.1000804), 2010-03-12
Supplement: ppat.1000804.s007.pdf [file ppat.1000804.s007.pdf]

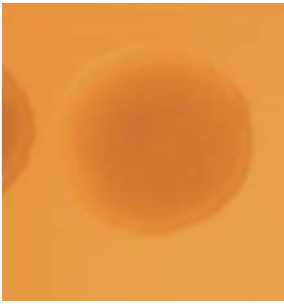

PA01

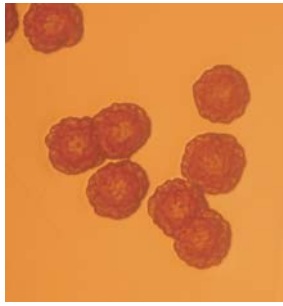

$\Delta yfiR$

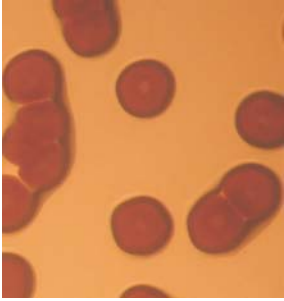

ClinSCV-110  
pMR20

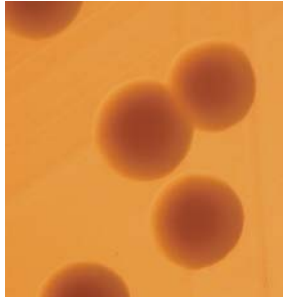

ClinSCV-110  
pMR20-*yfiR*-M2
