# Supplementary material for: YfiBNR Mediates Cyclic di-GMP Dependent Small Colony Variant Formation and Persistence in Pseudomonas aeruginosa
Source: PLoS Pathog. 2010 Mar 12;6(3):e1000804. doi: 10.1371/journal.ppat.1000804 (PMC2837407; doi:10.1371/journal.ppat.1000804)
Supplement: Table S1 — Strains and plasmids used in this study (0.11 MB PDF) [file ppat.1000804.s001.pdf]

**Table S1: Bacterial strains and plasmids**

| Strains                                      | Description                                                                                                                                                              | Reference  |
|----------------------------------------------|--------------------------------------------------------------------------------------------------------------------------------------------------------------------------|------------|
| <i>P. aeruginosa</i>                         |                                                                                                                                                                          |            |
| PA01                                         | Wild-type <i>P. aeruginosa</i>                                                                                                                                           | [1]        |
| $\Delta yfiR$                                | PA01 with <i>yfiR</i> deleted                                                                                                                                            | this study |
| $\Delta yfiNR$                               | PA01 with <i>yfiNR</i> deleted                                                                                                                                           | this study |
| $\Delta yfiBNR$                              | PA01 with <i>yfiBNR</i> deleted                                                                                                                                          | this study |
| <i>yfiBNR</i> -<br>complementation strains   | $\Delta yfiBNR$ with <i>yfiBNR</i> complementation operons inserted at the <i>Att::Tn7</i> locus. Ten strains in total                                                   | this study |
| PA01 <i>yfiR</i> -M2                         | $\Delta yfiR$ with <i>yfiR</i> -M2 inserted at the <i>Att::Tn7</i> locus                                                                                                 | this study |
| $\Delta yfiN$ <i>yfiR</i> -M2                | $\Delta yfiNR$ with <i>yfiR</i> -M2 inserted at the <i>Att::Tn7</i> locus                                                                                                | this study |
| $\Delta yfiBN$ <i>yfiR</i> -M2               | $\Delta yfiBNR$ with <i>yfiR</i> -M2 inserted at the <i>Att::Tn7</i> locus                                                                                               | this study |
| PA01-Gm <sup>R</sup>                         | Gm <sup>R</sup> , PA01 with the gentamycin resistance cassette inserted at the <i>Att::Tn7</i> locus                                                                     | this study |
| PA01 <i>cupA::Tn</i>                         | Tet <sup>R</sup> , PA01 with the <i>lacZ</i> -Tn5 transposon inserted into <i>cupA4</i>                                                                                  | [2]        |
| PA01 <i>cupB::Tn</i>                         | Tet <sup>R</sup> , PA01 with the <i>phoA</i> -Tn5 transposon inserted into <i>cupB4</i>                                                                                  | [2]        |
| PA01 <i>cupC::Tn</i>                         | Tet <sup>R</sup> , PA01 with the <i>lacZ</i> -Tn5 transposon inserted into <i>cupC2</i>                                                                                  | [2]        |
| PA01 <i>pelG::Tn</i>                         | Tet <sup>R</sup> , PA01 with the <i>phoA</i> -Tn5 transposon inserted into <i>pelG</i>                                                                                   | [2]        |
| PA01 $\Delta pslAB$                          | Gm <sup>R</sup> , PA01 containing the WFP60 $\Delta pslAB$ cassette                                                                                                      | [3]        |
| PA01 <i>pelG::Tn</i> $\Delta pslAB$          | Tet <sup>R</sup> , Gm <sup>R</sup> , PA01 containing the WFP60 $\Delta pslAB$ cassette, with the <i>phoA</i> -Tn5 transposon inserted into <i>pelG</i>                   | this study |
| $\Delta yfiR$ <i>cupA::Tn</i>                | Tet <sup>R</sup> , PA01 with the <i>lacZ</i> -Tn5 transposon inserted into <i>cupA4</i>                                                                                  | this study |
| $\Delta yfiR$ <i>cupB::Tn</i>                | Tet <sup>R</sup> , PA01 with the <i>phoA</i> -Tn5 transposon inserted into <i>cupB4</i>                                                                                  | this study |
| $\Delta yfiR$ <i>cupC::Tn</i>                | Tet <sup>R</sup> , PA01 with the <i>lacZ</i> -Tn5 transposon inserted into <i>cupC2</i>                                                                                  | this study |
| $\Delta yfiR$ <i>pelG::Tn</i>                | Tet <sup>R</sup> , PA01 with the <i>phoA</i> -Tn5 transposon inserted into <i>pelG</i>                                                                                   | this study |
| $\Delta yfiR$ $\Delta pslAB$                 | Gm <sup>R</sup> , PA01 containing the WFP60 $\Delta pslAB$ cassette                                                                                                      | this study |
| $\Delta yfiR$ <i>pelG::Tn</i> $\Delta pslAB$ | Tet <sup>R</sup> , Gm <sup>R</sup> , PA01 containing the WFP60 $\Delta pslAB$ cassette, with the <i>phoA</i> -Tn5 transposon inserted into <i>pelG</i>                   | this study |
| ClinSCV-110                                  | SCV strain isolated from CF sputum                                                                                                                                       | this study |
| <i>E. coli</i>                               |                                                                                                                                                                          |            |
| BL21-(DE3)                                   | Sm <sup>R</sup> , K12 <i>recF143 lacZ<sup>f</sup> lacZ<math>\Delta</math>.M15, xylA</i>                                                                                  | Novagen    |
| DH5 $\alpha$                                 | <i>endA1, hsdR17(r<sub>K</sub>-m<sub>K</sub>+), supE44, recA1, gyrA (Nal<sup>r</sup>), relA1, <math>\Delta(lacZYA-argF)U169, deoR, \Phi 80dlac\Delta(lacZ)M15</math></i> | [4]        |
| MM337                                        | K-12 <i>araD139 flbB5301 ptsF25 rbsR relA1 rpsL150 -(argF-lac)U169 -cya</i>                                                                                              | M. Manson  |
| DY330                                        | W3110 $\Delta lacU169 gal490 lcl857 \Delta(cro-bioA)$                                                                                                                    | [5]        |
| Plasmids                                     |                                                                                                                                                                          |            |
| pALMAR3                                      | Insertion vector for Tet <sup>R</sup> Mariner transposon                                                                                                                 | A. Levi    |
| pBV-MCS4                                     | Gm <sup>R</sup> , vanillate inducible high-copy number plasmid                                                                                                           | [6]        |
| pBV-PA5295                                   | pBV-MCS4 with PA5295 under the control of vanillate promoter                                                                                                             | [7]        |
| pBV-PA5295 <sub>E328A</sub>                  | pBV-MCS4 with PA5292 <sub>E328A</sub> under the control of vanillate promoter                                                                                            | [7]        |
| pET42b                                       | Km <sup>R</sup> , purification vector, His <sub>6</sub> -tag                                                                                                             | Novagen    |
| pET42b- <i>yfiN</i>                          | pET42b with N-terminal truncated <i>yfiN</i> as <i>XhoI</i> - <i>NdeI</i> fragment                                                                                       | this study |
| pET42b- <i>yfiB</i>                          | pET42b with <i>yfiB</i> as <i>XhoI</i> - <i>NdeI</i> fragment                                                                                                            | this study |
| pUC18T-mini-Tn7T-Gm                          | Amp <sup>R</sup> , Gm <sup>R</sup> , Tn7 insertion vector                                                                                                                | [8]        |
| <i>yfiBNR</i> -complementation               | pUC18T-mini-Tn7T-Gm with <i>yfiBNR</i> operon alleles as <i>HindIII</i> - <i>BamHI</i>                                                                                   | this study |

|                                      |                                                                                                      |            |
|--------------------------------------|------------------------------------------------------------------------------------------------------|------------|
| vectors                              | fragments. Twelve plasmids in total                                                                  |            |
| pTNS2                                | Amp <sup>R</sup> , helper plasmid for Tn7 integration events                                         | [8]        |
| pME6032                              | Tet <sup>R</sup> , P <sub>K</sub> , 9.8 kb pVS1 derived shuttle vector                               | [9]        |
| pME6032- <i>yfiB</i>                 | pME6032 with <i>yfiB</i> as <i>EcoRI-BamHI</i> fragment                                              | this study |
| pBBR-MCS4                            | Amp <sup>R</sup> , broad-host range cloning vector                                                   | [10]       |
| pBBR-MCS5                            | Gm <sup>R</sup> , broad-host range cloning vector                                                    | [10]       |
| p- <i>yfiR</i>                       | pBBR-MCS5 with <i>yfiR</i> as <i>BamHI-HindIII</i> fragment                                          | this study |
| pBBR4- <i>wspR19</i>                 | pBBR-MCS4 with <i>wspR19</i> as <i>EcoRI-HindIII</i> fragment                                        | this study |
| pME- <i>araC</i>                     | pME6032 with <i>araC/pBAD</i> -promoter as <i>EcoRI-BamHI</i> fragment                               | this study |
| p- <i>ara-yfiN</i>                   | pME- <i>araC</i> with <i>yfiN</i> as <i>SacI-BglII</i> fragment                                      | this study |
| pME- <i>araC-yfiR-phoA</i>           | pME- <i>araC</i> with <i>yfiR-phoA</i> fusion as <i>EcoRI-XhoI</i> fragment                          | this study |
| pME- <i>araC-tr-yfiR-phoA</i>        | pME- <i>araC</i> with trunc <i>yfiR-phoA</i> fusion as <i>EcoRI-XhoI</i> fragment                    | this study |
| pME- <i>yfiR-cherry</i>              | pME6032 with <i>yfiR-Mcherry</i> fusion as <i>EcoRI-BglII</i> fragment                               | this study |
| pMR20                                | Tet <sup>R</sup> , low copy number and broad host-range vector                                       | [11]       |
| pMR20- <i>yfiBNR</i>                 | pMR20 with <i>yfiBNR</i> as <i>HindIII-BamHI</i> fragment                                            | this study |
| pMR20- <i>yfiR-M2</i>                | pMR20 with <i>yfiR-M2</i> as <i>HindIII-BamHI</i> fragment                                           | this study |
| pTn7- <i>yfiR-M2</i>                 | pUC18T-mini-Tn7T with <i>yfiR-M2</i> as <i>HindIII-BamHI</i> fragment                                | this study |
| pAD6Ω                                | Sm <sup>R</sup> , Tet <sup>R</sup> , pMR20 derivative containing EGFP under the <i>lac</i> promoter  | this study |
| pKT25                                | pSU40 derivative with T25 fragment of CyaA                                                           | [12]       |
| pKT25- <i>zip</i>                    | pKT25 derivative with leucine zipper of GCN4                                                         | [12]       |
| pUT18C- <i>zip</i>                   | pUT18C derivative with leucine zipper of GCN4                                                        | [12]       |
| pUT18C                               | pUC19 derivative with T18 fragment of CyaA. C-terminal fusions                                       | [12]       |
| pUT18                                | pUC19 derivative with T18 fragment of CyaA. N-terminal fusions                                       | [12]       |
| pUT18C- <i>yfi</i> vectors           | Bacterial two-hybrid vectors with <i>yfi</i> genes as <i>XbaI-BamHI</i> fragments                    | this study |
| pKT25- <i>yfi</i> vectors            | Bacterial two-hybrid vectors with <i>yfi</i> genes as <i>XbaI-BamHI</i> fragments                    | this study |
| pUT18- <i>yfi</i> vectors            | Bacterial two-hybrid vectors with <i>yfi</i> genes as <i>HindIII-BamHI</i> fragments                 | this study |
| pME6032- <i>luxCDABE</i>             | pME6032 with <i>luxCDABE</i> as <i>EcoRI-BamHI</i> fragment                                          | this study |
| pME6032-promoter- <i>lux</i> vectors | pME6032- <i>luxCDABE</i> with PA01 promoters as <i>XhoI-EcoRI</i> fragments. Eight plasmids in total | this study |
| pEX18Ap                              | Amp <sup>R</sup> , <i>oriT</i> +, <i>sacB</i> +, gene replacement vector                             | [13]       |
| pEX18Ap-Δ <i>yfiBNR</i>              | pEX18Ap with <i>yfiBNR</i> Gm <sup>R</sup> -FRT deletion cassette as <i>HindIII-KpnI</i> fragment    | this study |
| pEX18Ap-Δ <i>yfiNR</i>               | pEX18Ap with <i>yfiNR</i> Gm <sup>R</sup> -FRT deletion cassette as <i>HindIII-KpnI</i> fragment     | this study |
| pEX18Ap-Δ <i>yfiR</i>                | pEX18Ap with <i>yfiR</i> deletion cassette as <i>HindIII-KpnI</i> fragment                           | this study |
| pFLP2                                | Amp <sup>R</sup> , FRT cassette excision vector                                                      | [13]       |

## References

1. Holloway BW (1955) Genetic recombination in *Pseudomonas aeruginosa*. J Gen Microbiol 13: 572-581.
2. Jacobs MA, Alwood A, Thaipisuttikul I, Spencer D, Haugen E, et al. (2003) Comprehensive transposon mutant library of *Pseudomonas aeruginosa*. PNAS 100: 14339-14344.
3. Jackson KD, Starkey M, Kremer S, Parsek MR, Wozniak DJ (2004) Identification of *psl*, a locus encoding a potential exopolysaccharide that is essential for *Pseudomonas aeruginosa* PAO1 biofilm formation. J Bacteriol 186: 4466-4475.
4. Woodcock DM, Crowther PJ, Doherty J, Jefferson S, DeCruz E, et al. (1989) Quantitative evaluation of *Escherichia coli* host strains for tolerance to cytosine methylation in plasmid and phage recombinants. Nucleic Acids Res 17: 3469-3478.
5. Yu D, Ellis HM, Lee EC, Jenkins NA, Copeland NG, et al. (2000) An efficient recombination system for chromosome engineering in *Escherichia coli*. Proc Natl Acad Sci U S A 97: 5978-5983.
6. Thanbichler M, Iniesta AA, Shapiro L (2007) A comprehensive set of plasmids for vanillate- and xylose-inducible gene expression in *Caulobacter crescentus*. Nucleic Acids Res 35: e137.
7. Duerig A, Abel S, Folcher M, Nicollier M, Schwede T, et al. (2009) Second messenger-mediated spatiotemporal control of protein degradation regulates bacterial cell cycle progression. Genes Dev 23: 93-104.
8. Choi KH, Gaynor JB, White KG, Lopez C, Bosio CM, et al. (2005) A Tn7-based broad-range bacterial cloning and expression system. Nat Methods 2: 443-448.
9. Heeb S, Itoh Y, Nishijyo T, Schnider U, Keel C, et al. (2000) Small, stable shuttle vectors based on the minimal pVS1 replicon for use in gram-negative, plant-associated bacteria. Mol Plant Microbe Interact 13: 232-237.
10. Kovach ME, Elzer PH, Hill DS, Robertson GT, Farris MA, et al. (1995) Four new derivatives of the broad-host-range cloning vector pBBR1MCS, carrying different antibiotic-resistance cassettes. Gene 166: 175-176.
11. Roberts RC, Mohr CD, Shapiro L (1996) Developmental programs in bacteria. Curr Top Dev Biol 34: 207-257.
12. Karimova G, Ullmann A, Ladant D (2001) Protein-protein interaction between *Bacillus stearothermophilus* tyrosyl-tRNA synthetase subdomains revealed by a bacterial two-hybrid system. J Mol Microbiol Biotechnol 3: 73-82.
13. Hoang TT, Karkhoff-Schweizer RR, Kutchma AJ, Schweizer HP (1998) A broad-host-range FLP-FRT recombination system for site-specific excision of chromosomally-located DNA sequences: application for isolation of unmarked *Pseudomonas aeruginosa* mutants. Gene 212: 77-86.
