# Supplementary material for: YfiBNR Mediates Cyclic di-GMP Dependent Small Colony Variant Formation and Persistence in Pseudomonas aeruginosa
Source: PLoS Pathog. 2010 Mar 12;6(3):e1000804. doi: 10.1371/journal.ppat.1000804 (PMC2837407; doi:10.1371/journal.ppat.1000804)
Supplement: Table S2 — Primers used in this study (0.02 MB PDF) [file ppat.1000804.s002.pdf]

**Table S2: Primers**

| <i>Primer</i> | <i>Description</i> | <i>Sequence</i>                                              |
|---------------|--------------------|--------------------------------------------------------------|
| A             | yfiR for           | CCGAAGCTTGCCGCCCCCTG                                         |
| B             | yfiR rev           | GAGGATCCATCACGGAGTGGC                                        |
| C             | yfiN for           | CAGAGCTCATGAACCGTCGTCGTC                                     |
| D             | yfiN rev           | GCGGATCCTCTACTTGGGTGG                                        |
| E             | yfiB rev           | GAGGATCCGATTACTCGGCG                                         |
| F             | yfiR-phoA for      | CTCTCTCAATTGTTGCCTTCGTTGCCAC                                 |
| G             | truncyfiR-phoA for | CTCTCTCAATTGTTGGACGCACGGACGTCGATC                            |
| H             | yfiR-phoA rev      | GTCTCGAGCGGAGTGGCCTGC                                        |
| I             | phoA for           | CCACTCCGCTCGAGACCCGGACACCAGAAATG                             |
| J             | phoA rev           | GTGGTACCTTATTTAGCCCCAG                                       |
| K             | A-site for         | CTGGGCGGCGCAGAATTCGCCGTC                                     |
| L             | A-site rev         | GACGGCGAATTCTGCGCCGCCAG                                      |
| M             | I-site for         | GTGGGCAGTTGGCAGAAAGCGACC                                     |
| N             | I-site rev         | GGTCGCTTTCTGCCAACTGCCAC                                      |
| O             | yfiB for           | GAGAATTCGTGCTACCCAG                                          |
| P             | M2lambdafor        | CCCGAGCGTATTGAACTGGCAAGGCGGCAGGCCACTCCGGACTACAAAGACCATGACGG  |
| Q             | M2lambda rev       | TTACTCGGCGGGAACGATGATGGCGACGCGGCGTTCTCGCATATGAATATCCTCCTTAG  |
| R             | omegafor           | GGGGGAAAGCCACGTTGTGTCTCAAATCTCTGATGTTACGTCATCCACCGGATCAATTC  |
| S             | omegarev           | ATTCATATCAGGATTATCAATACCATATTTTTGAAAAAGCAATGCGGATGTTGCGATTAC |
| T             | purNfor            | GGCATATGCGCGGTATCGTCG                                        |
| U             | purNrev            | GCCTCGAGCTTGGGTGGAGC                                         |
| V             | purBfor            | GGCATATGCTACCCAGAGGCTC                                       |
| W             | purBrev            | GTCTCGAGCTCGGCGGGAACGATG                                     |
| X             | BTH-NyfiR          | ACTCTAGAGGACGCACGGACGTC                                      |
| Y             | BTH-CyfiR F        | CCAAGCTTGGACGCACGGACGTC                                      |
| Z             | BTH-CyfiR R        | GGGGATCCTCCGGAGTGGCCTG                                       |
| AA            | BTH-NyfiN          | ACTCTAGAGCGCGGTATCGTCG                                       |
| AB            | BTH-CyfiN F        | CCAAGCTTGC GCGGTATCGTCG                                      |
| AC            | BTH-CyfiN R        | GGGGATCCTCCTTGGGTGGAGC                                       |
| AD            | B2H-HAMP N         | GGGGATCCTCTACGCCTGCCAGGATTC                                  |
| AE            | B2H-HAMP-C         | GGGGATCCTCCGCCTGCCAGGATTC                                    |
| AF            | B2H-GGDEF N        | ACTCTAGAGCTGCAGGACGAGAAC                                     |
| AG            | B2H-GGDEF C        | CCAAGCTTGCTGCAGGACGAGAAC                                     |
| AH            | B2H-Nperi F        | ACTCTAGAGGACCCCAACCAGCAAC                                    |
| AI            | B2H-Nperi R        | GGGGATCCTCTAGTCGTGCAGGATCGG                                  |
| AJ            | B2H-Cperi F        | CCAAGCTTGGACCCCAACCAGCAAC                                    |
| AK            | B2H-Cperi R        | GGGGATCCTCGTCGTGCAGGATCGG                                    |
| AL            | psl prom F         | CCACTCGAGAGATCTTGGCCGAGCGGCCTG                               |
| AM            | cupB prom F        | CCACTCGAGAGATCTGCTACTGGGGCAATG                               |
| AN            | cupC prom F        | CCACTCGAGAGATCTGAAGTCTTAGATGAG                               |
| AO            | yfi prom F         | CCACTCGAGAGATCTAGGATTTCCCGGATC                               |
| AP            | psl prom R         | CCAGAATTCGTTGTTTGCTCTG                                       |

|    |                 |                                                |
|----|-----------------|------------------------------------------------|
| AQ | cupB prom R     | CCAGAATTCGATTGAGCTTCCTTTTG                     |
| AR | cupC prom R     | CCAGAATTCCTGATTTCTTTGGAG                       |
| AS | yfi prom R      | CCAGAATTCAAAGGTTTCCTCCAG                       |
| AT | ALMAR3PCR       | CGCAAACCAACCCTTGGCAG                           |
| AU | ALMAR3seq       | ACATATCCATCGCGTCCGCC                           |
| AV | Arb-PCR1        | GGCCAGCGAGCTAACGAGACNNNGTTGC                   |
| AW | Arb-PCR2        | GGCCAGCGAGCTAACGAGAC                           |
| AX | Gent for        | CGAATTAGCTTCAAAGCGCTCTGA                       |
| AY | Gent rev        | CGAATTGGGGATCTTGAAGTTCCT                       |
| AZ | yfiBNR Up for   | CCGGTACCGCTACCCGCGCATGGAACCCCTC                |
| BA | yfiBNR Up rev   | TCAGAGCGCTTTTGAAGCTAATTCGAAAGGTTTCCTCCAGGAAAAC |
| BB | yfiBNR Dn for   | AGGAACTTCAAGATCCCCAATTCGTCCTGCGCTCGCGGGCTGC    |
| BC | yfiBNR Dn rev   | CCAAGCTTGCTAGAACGCGCAGAGCATGGC                 |
| BD | yfiNR Dn for    | AGGAACTTCAAGATCCCCAATTCGTTTCAGGAAGAAAAGGAG     |
| BE | yfiNR Dn rev    | CCAAGCTTGCTAGGCCGGAAGCGGGGTAGTG                |
| BF | yfiR Up for     | CCAAGCTTGCTACCCGCGCATGGAACCCCTC                |
| BG | yfiR Up rev     | CCTTGCCAGGGTGCGCCTGTAGAGGTC                    |
| BH | yfiR Dn for     | AGGCGCACCTGGCAAGGCGGCAGGCCAC                   |
| BI | yfiR Dn rev     | CCGGTACCGCTCGATGCCGGCTTCCGGTAC                 |
| BJ | yfiR Cherry For | GTCTCGAGGTGAGCAAGGGCGAG                        |
| BK | yfiR Cherry rev | TAGGATCCCTTACTTGTACAGCTC                       |
